# Supplementary material for: The origin of anomalous large reversible capacity for SnO2 conversion reaction
Source: Royal Society of Chemistry journal article supplement (doi:10.1039/c4ta01994f), 2014-01-01
Supplement: c4ta01994f1.pdf [file c4ta01994f1.pdf]

# Supporting Information

## Origin of Anomalous Large Reversible Capacity for SnO<sub>2</sub> conversion reaction

Kazuaki Kisu,<sup>1</sup> Minami Iijima,<sup>1</sup> Etsuro Iwama,<sup>1</sup> Morihiko Saito,<sup>1</sup> Yuki Orikasa,<sup>2</sup> and

Wako Naoi,<sup>3</sup> Katsuhiko Naoi<sup>\*1,3,4</sup>

*<sup>1</sup>Department of Applied Chemistry, Tokyo University of Agriculture & Technology, 2-24-16*

*Naka-cho, Koganei, Tokyo 184-8558, Japan*

*<sup>2</sup>Graduate School of Human and Environment Studies, Kyoto University, Yoshida-nihonmatsu-*

*cho, Sakyo-ku, Kyoto 606-8501, Japan*

*<sup>3</sup>Division of Art and Innovative Technologies, K & W Inc., 1-3-16-901 Higashi, Kunitachi,*

*Tokyo 186-0002, Japan*

*<sup>4</sup>Advanced Capacitor Research Center, Tokyo University of Agriculture & Technology, 2-24-16*

*Naka-cho, Koganei, Tokyo 184-8588, Japan*

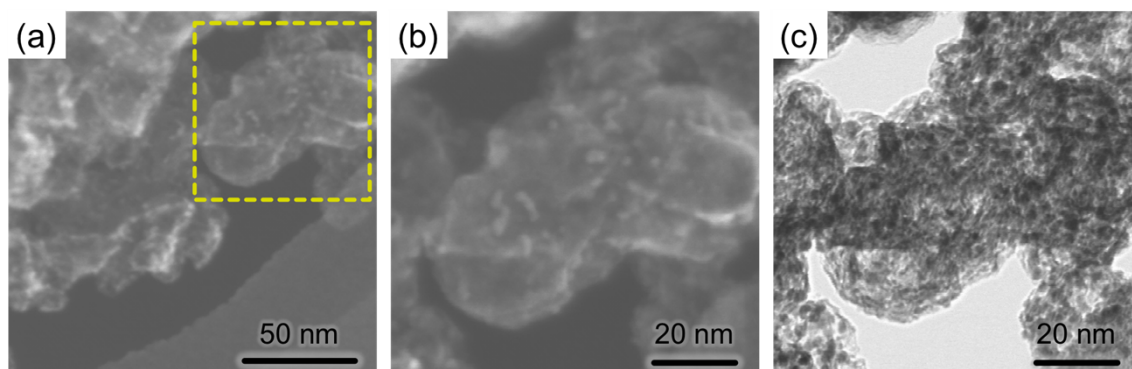

Figure S1. Bright-field ((a) and (b)) and dark-field (c) SEM images for the SnO<sub>2</sub>/KB (45/55) composite.

In the bright-field image (a), one can see the agglomerated structure of KB spheres. A part of the agglomeration (the area surround by a yellow dotted square) was re-focused in higher resolution and shown in the image (b). With the closer view of KB structure (image (b)), only few SnO<sub>2</sub> particles can be seen on the outer surface of KB. (c) The dark-field SEM image of the same part of KB structure (image (b)) was pictured in order to verify the encapsulation of SnO<sub>2</sub> nanoparticles within the KB hollow structure. Contrary to the bright-field image (b), many small SnO<sub>2</sub> nanodots with a diameter of few nanometers can be seen in the image (c), which is consistent with the HRTEM image for SnO<sub>2</sub>/KB (45/55) shown in Fig.2 (c).

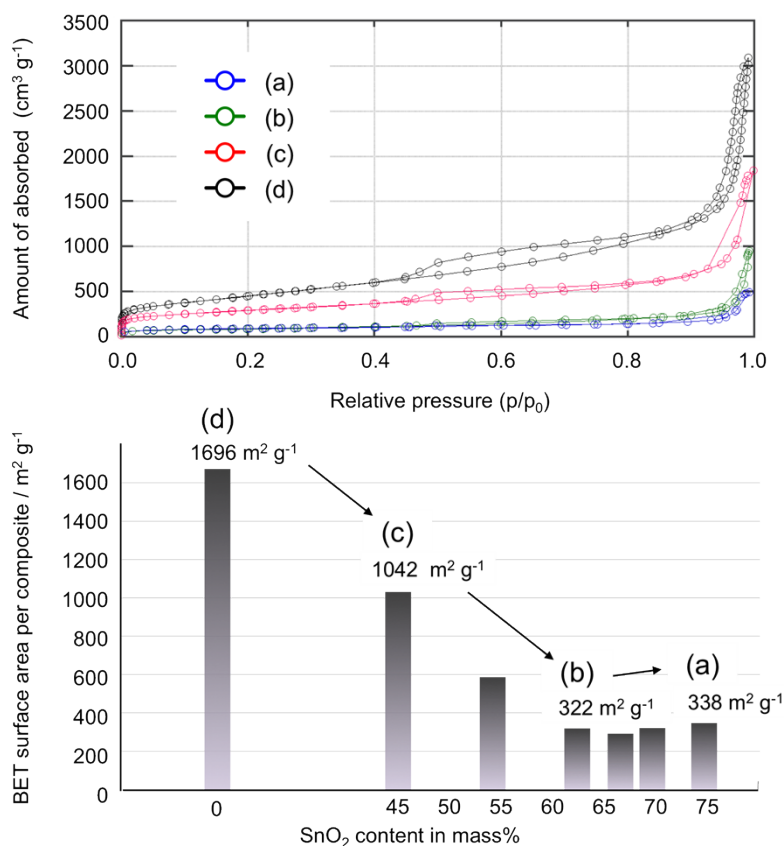

Figure S2 (TOP) Nitrogen adsorption–desorption isotherm curves for the (a) SnO<sub>2</sub>/KB = 75/25, (b) SnO<sub>2</sub>/KB = 63/37, (C) SnO<sub>2</sub>/KB = 45/55, and (d) pure KB (UC-treated KB, denoted as UC-KB).

(BOTTOM) Relationship between the specific surface area (SSA) per SnO<sub>2</sub>/KB composite mass and the SnO<sub>2</sub> content (0 to 75 wt%, 8 samples). In the figure, samples (a)-(c) correspond to the samples shown in Fig.2 (A)-(C), respectively. The SSA of the composites linearly decreases with a SnO<sub>2</sub> dosage increase from 0 wt% (UC-KB) up to 67 wt%, while the SSA slightly increases from 67 to 75 wt%. The slight increase of the SSA from 67 wt% can be due to the SnO<sub>2</sub> nanoparticles piled on the outer sphere of KB (see Fig. 2 (A)). Namely, the 8 samples can be divided into 2 groups; one is the high-dispersion composites with highly dispersed SnO<sub>2</sub> nanoparticles confined within the hollow structure of KB when the SnO<sub>2</sub> dosage is less than 67 wt%, and the other is the outer-deposition composites with the exposed SnO<sub>2</sub> nanoparticles outside of KB sphere when the SnO<sub>2</sub> dosage exceeds 67 wt%.

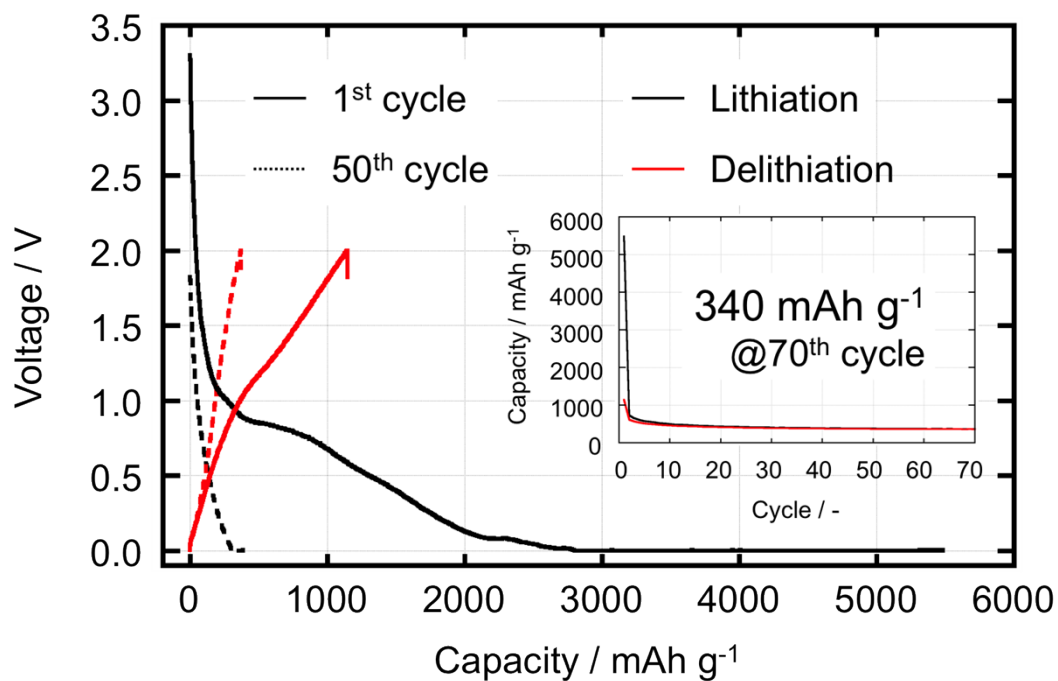

Figure S3. Charge discharge curves for the pure KB (UC-treated KB, denoted as UC-KB in the article) at 1<sup>st</sup> (heavy line) and 50<sup>th</sup> (broken line) cycle. The cycling test was performed on half cells consisting of Li/1 M LiPF<sub>6</sub> (EC+DEC)/UC-KB in the CC-CV (lithiation) and CC (delithiation) mode between 0.0 and 2.0 V at a current density of 300 mA g<sup>-1</sup> (the same current density as the data shown in Fig.3). Inset shows the specific capacity of the discharge (lithiation) and charge (delithiation). The stable charge-discharge capacity of UC-KB was 340 mAh g<sup>-1</sup> at 70<sup>th</sup> cycle.

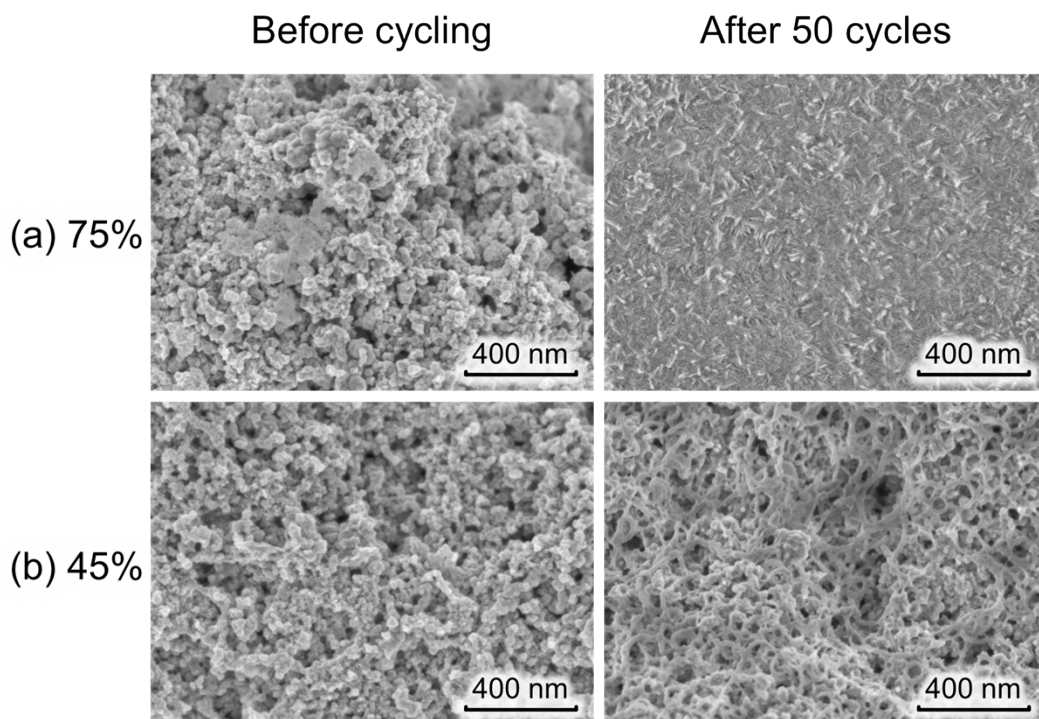

Figure S4. SEM images of the surface of SnO<sub>2</sub>/KB composite electrodes with SnO<sub>2</sub> = (a) 75 and (b) 45 wt% before and after 50 cycles. These images (a) and (b) before cycling correspond to the electrode surface for Fig. 3 (A) and (C), respectively. As shown in (a) 75 wt% after 50 cycles (top right), the polymeric mixture (possibly consisting of SEI and Li<sub>2</sub>O) uniformly covered the electrode surface and filled the pore of the composites, while the surface morphology of (b) 45wt% more or less unchanged (down right).

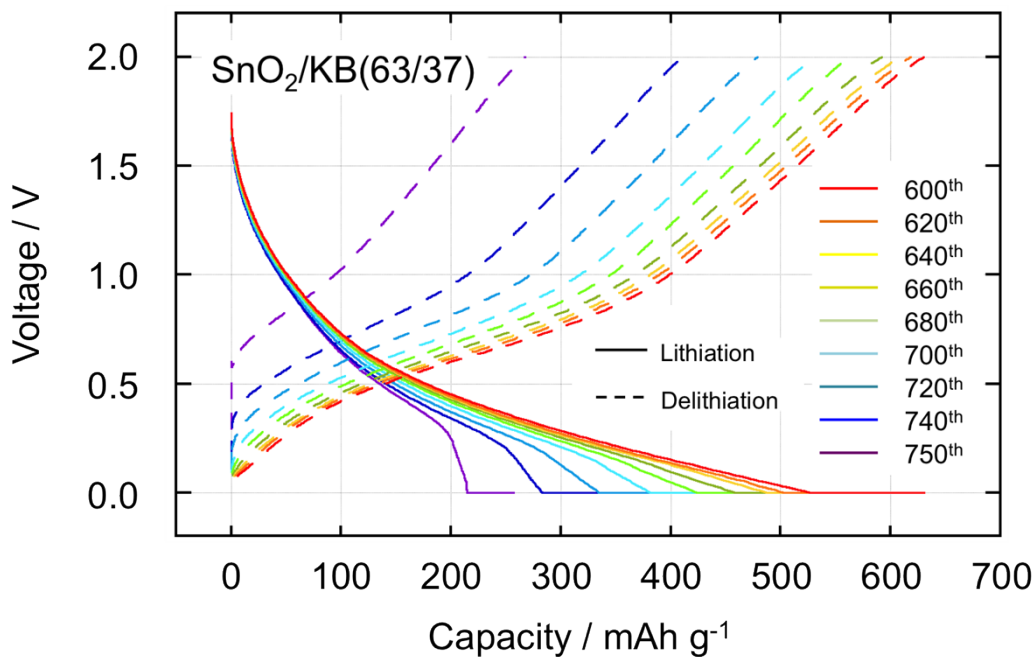

Figure S5. Charge-discharge curves for the SnO<sub>2</sub>/KB (63/37) in the range of 600<sup>th</sup> and 750<sup>th</sup> cycle. The cycle tests of SnO<sub>2</sub>/KB (63/37) are plotted in Fig.3 (B). The cycling test was performed on half cells consisting of Li/1 M LiPF<sub>6</sub> in EC+DEC/(SnO<sub>2</sub>/KB = 63/37) in the CC-CV (lithiation) and CC (delithiation) mode between 0.0 and 2.0 V at a current density of 300 mA g<sup>-1</sup>. From these curves, one can see two changes occurring within the 150 cycles; i) disappearance of the capacity at the voltage lower than 0.4 V during lithiation process, and ii) increase of internal resistance (IR) drops at the beginning of delithiation. Both phenomena suggest that the electrochemical reaction below 0.4V including Sn alloying, lithiation of KB, and SEI formation, became largely resistive after 600<sup>th</sup> cycle.

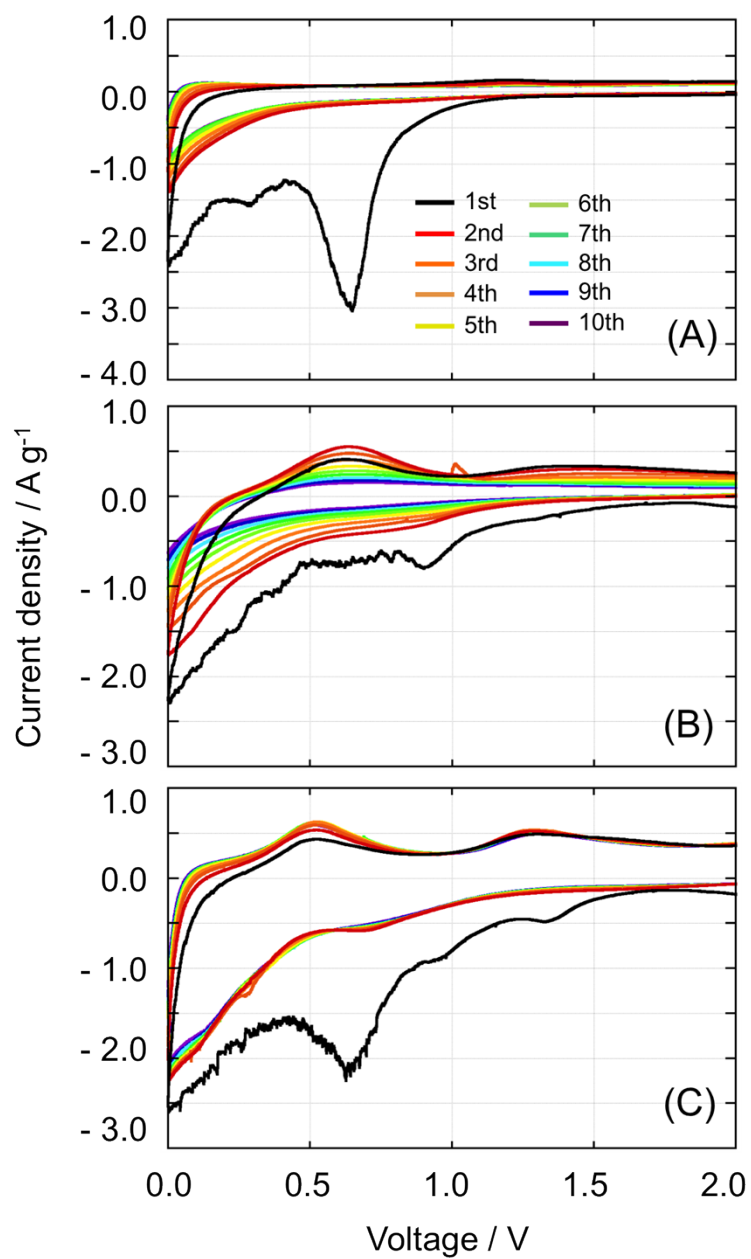

Figure S6. Cyclic voltammograms for the (A) pure KB (UC-treated KB (UC-KB)), (B)  $\text{SnO}_2/\text{KB} = 75/25$ , and (C)  $\text{SnO}_2/\text{KB} = 45/55$ . The cyclic voltammetry test was performed on laminate-type cells consisting of  $\text{Li}/1 \text{ M LiPF}_6 \text{ (EC+DEC)}/\text{UC-SnO}_2/\text{KB}$  (or UC-KB) in the voltage range of 0.0–2.0 V at a scan rate of  $0.2 \text{ mV s}^{-1}$ .

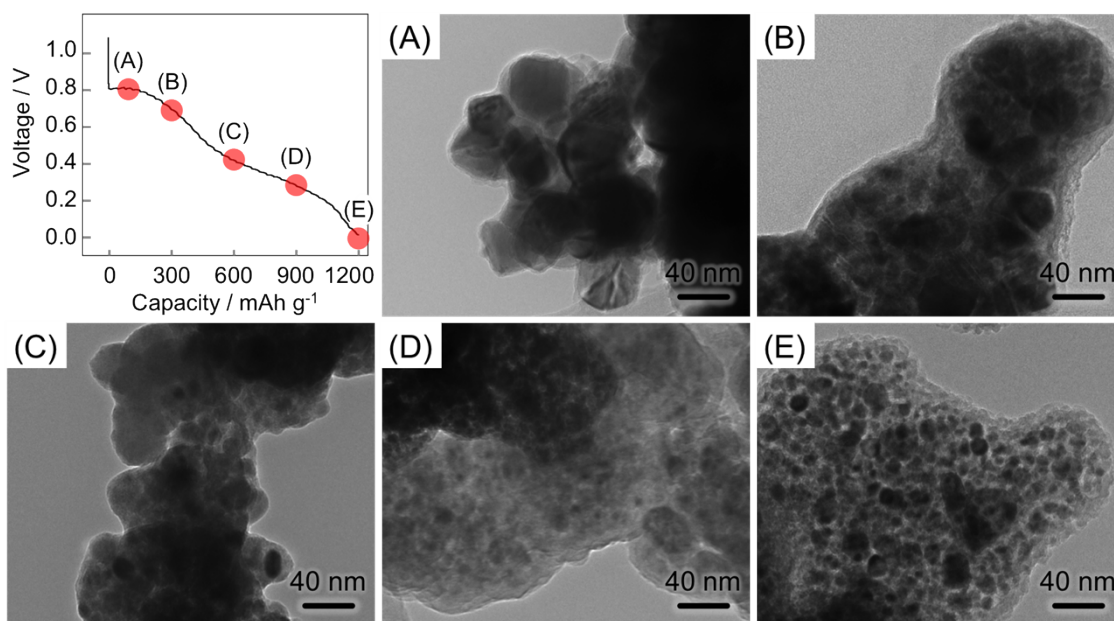

Figure S7. Lithiation profile curve (top left) and HRTEM images showing morphology changes of the bulk SnO<sub>2</sub> particles (purchased from Showa Kako Corp., 50-100 nm of the particle size) at different states of lithiation (A) 50 mAh g<sup>-1</sup>, (B) 300 mAh g<sup>-1</sup>, (C) 600 mAh g<sup>-1</sup>, (D) 900 mAh g<sup>-1</sup>, (E) 1200 mAh g<sup>-1</sup>. Tested electrodes were composed of SnO<sub>2</sub> (90 wt%) and PVDF (10 wt%) without any conductive carbons. The electrochemical performance was performed on 2032 coin-type half cells consisting of Li/1 M LiPF<sub>6</sub> in EC+DEC/SnO<sub>2</sub> at a current density of 300 mAh g<sup>-1</sup>. In the course of lithiation, the bulk SnO<sub>2</sub> particles are pulverized into small Sn particles. Each particle is surrounded by a large amount of polymeric mixture of SEI and Li<sub>2</sub>O, thus isolated from other particles.
